# Supplementary material for: Interventions Based on Mind–Body Therapies for the Improvement of Attention-Deficit/Hyperactivity Disorder Symptoms in Youth: A Systematic Review
Source: MDPI journal article supplement (doi:10.3390/medicina55070325), 2019-06-30
Supplement: s1 [file s1]

**Supplementary Table 1. PRISMA-P 2015 Checklist**

**PRISMA-P 2015 Checklist**

**Title:** Interventions based on Mind-Body Therapies for the improvement of attention-deficit/ hyperactivity disorder symptoms in youth: a systematic review

| Section/topic                     | #  | Checklist item                                                                                                                                                                                  | Information reported                |                                     | Line number(s) |  |  |  |
|-----------------------------------|----|-------------------------------------------------------------------------------------------------------------------------------------------------------------------------------------------------|-------------------------------------|-------------------------------------|----------------|--|--|--|
|                                   |    |                                                                                                                                                                                                 | Yes                                 | No                                  |                |  |  |  |
| <b>ADMINISTRATIVE INFORMATION</b> |    |                                                                                                                                                                                                 |                                     |                                     |                |  |  |  |
| <b>Title</b>                      |    |                                                                                                                                                                                                 |                                     |                                     |                |  |  |  |
| Identification                    | 1a | Identify the report as a protocol of a systematic review                                                                                                                                        | <input checked="" type="checkbox"/> | <input type="checkbox"/>            | 3              |  |  |  |
| Update                            | 1b | If the protocol is for an update of a previous systematic review, identify as such                                                                                                              | <input type="checkbox"/>            | <input checked="" type="checkbox"/> |                |  |  |  |
| <b>Registration</b>               | 2  | If registered, provide the name of the registry (e.g., PROSPERO) and registration number in the Abstract                                                                                        | <input type="checkbox"/>            | <input checked="" type="checkbox"/> |                |  |  |  |
| <b>Authors</b>                    |    |                                                                                                                                                                                                 |                                     |                                     |                |  |  |  |
| Contact                           | 3a | Provide name, institutional affiliation, and e-mail address of all protocol authors; provide physical mailing address of corresponding author                                                   | <input checked="" type="checkbox"/> | <input type="checkbox"/>            | 8-17           |  |  |  |
| Contributions                     | 3b | Describe contributions of protocol authors and identify the guarantor of the review                                                                                                             | <input checked="" type="checkbox"/> | <input type="checkbox"/>            | 19-20          |  |  |  |
| <b>Amendments</b>                 | 4  | If the protocol represents an amendment of a previously completed or published protocol, identify as such and list changes; otherwise, state plan for documenting important protocol amendments | <input type="checkbox"/>            | <input checked="" type="checkbox"/> |                |  |  |  |
| <b>Support</b>                    |    |                                                                                                                                                                                                 |                                     |                                     |                |  |  |  |
| Sources                           | 5a | Indicate sources of financial or other support for the review                                                                                                                                   | <input type="checkbox"/>            | <input type="checkbox"/>            | NA             |  |  |  |
| Sponsor                           | 5b | Provide name for the review funder and/or sponsor                                                                                                                                               | <input type="checkbox"/>            | <input type="checkbox"/>            | NA             |  |  |  |

| Section/topic          | #   | Checklist item                                                                                                                                                                                                            | Information reported                |                          | Line number(s)   |
|------------------------|-----|---------------------------------------------------------------------------------------------------------------------------------------------------------------------------------------------------------------------------|-------------------------------------|--------------------------|------------------|
|                        |     |                                                                                                                                                                                                                           | Yes                                 | No                       |                  |
| Role of sponsor/funder | 5c  | Describe roles of funder(s), sponsor(s), and/or institution(s), if any, in developing the protocol                                                                                                                        | <input type="checkbox"/>            | <input type="checkbox"/> | NA               |
| <b>INTRODUCTION</b>    |     |                                                                                                                                                                                                                           |                                     |                          |                  |
| Rationale              | 6   | Describe the rationale for the review in the context of what is already known                                                                                                                                             | <input checked="" type="checkbox"/> | <input type="checkbox"/> | 45-61            |
| Objectives             | 7   | Provide an explicit statement of the question(s) the review will address with reference to participants, interventions, comparators, and outcomes (PICO)                                                                  | <input checked="" type="checkbox"/> | <input type="checkbox"/> | 130-139          |
| <b>METHODS</b>         |     |                                                                                                                                                                                                                           |                                     |                          |                  |
| Eligibility criteria   | 8   | Specify the study characteristics (e.g., PICO, study design, setting, time frame) and report characteristics (e.g., years considered, language, publication status) to be used as criteria for eligibility for the review | <input checked="" type="checkbox"/> | <input type="checkbox"/> | 130-139          |
| Information sources    | 9   | Describe all intended information sources (e.g., electronic databases, contact with study authors, trial registers, or other grey literature sources) with planned dates of coverage                                      | <input checked="" type="checkbox"/> | <input type="checkbox"/> | 130-139<br>SF1   |
| Search strategy        | 10  | Present draft of search strategy to be used for at least one electronic database, including planned limits, such that it could be repeated                                                                                | <input checked="" type="checkbox"/> | <input type="checkbox"/> | SF1              |
| <b>STUDY RECORDS</b>   |     |                                                                                                                                                                                                                           |                                     |                          |                  |
| Data management        | 11a | Describe the mechanism(s) that will be used to manage records and data throughout the review                                                                                                                              | <input checked="" type="checkbox"/> | <input type="checkbox"/> | 148-164<br>Fig 1 |
| Selection process      | 11b | State the process that will be used for selecting studies (e.g., two independent reviewers) through each phase of the review (i.e., screening, eligibility, and inclusion in meta-analysis)                               | <input checked="" type="checkbox"/> | <input type="checkbox"/> | 148-176          |

| Section/topic                      | #   | Checklist item                                                                                                                                                                                                                              | Information reported                |                          | Line number(s) |
|------------------------------------|-----|---------------------------------------------------------------------------------------------------------------------------------------------------------------------------------------------------------------------------------------------|-------------------------------------|--------------------------|----------------|
|                                    |     |                                                                                                                                                                                                                                             | Yes                                 | No                       |                |
| Data collection process            | 11c | Describe planned method of extracting data from reports (e.g., piloting forms, done independently, in duplicate), any processes for obtaining and confirming data from investigators                                                        | <input checked="" type="checkbox"/> | <input type="checkbox"/> | 166-176        |
| Data items                         | 12  | List and define all variables for which data will be sought (e.g., PICO items, funding sources), any pre-planned data assumptions and simplifications                                                                                       | <input checked="" type="checkbox"/> | <input type="checkbox"/> | 130-139<br>SF1 |
| Outcomes and prioritization        | 13  | List and define all outcomes for which data will be sought, including prioritization of main and additional outcomes, with rationale                                                                                                        | <input checked="" type="checkbox"/> | <input type="checkbox"/> | 126-129        |
| Risk of bias in individual studies | 14  | Describe anticipated methods for assessing risk of bias of individual studies, including whether this will be done at the outcome or study level, or both; state how this information will be used in data synthesis                        | <input checked="" type="checkbox"/> | <input type="checkbox"/> | 177-197        |
| <b>DATA</b>                        |     |                                                                                                                                                                                                                                             |                                     |                          |                |
| Synthesis                          | 15a | Describe criteria under which study data will be quantitatively synthesized                                                                                                                                                                 | <input type="checkbox"/>            | <input type="checkbox"/> | NA             |
|                                    | 15b | If data are appropriate for quantitative synthesis, describe planned summary measures, methods of handling data, and methods of combining data from studies, including any planned exploration of consistency (e.g., $I^2$ , Kendall's tau) | <input type="checkbox"/>            | <input type="checkbox"/> | NA             |
|                                    | 15c | Describe any proposed additional analyses (e.g., sensitivity or subgroup analyses, meta-regression)                                                                                                                                         | <input type="checkbox"/>            | <input type="checkbox"/> | NA             |
|                                    | 15d | If quantitative synthesis is not appropriate, describe the type of summary planned                                                                                                                                                          | <input type="checkbox"/>            | <input type="checkbox"/> | NA             |
| Meta-bias(es)                      | 16  | Specify any planned assessment of meta-bias(es) (e.g., publication bias across studies, selective reporting within studies)                                                                                                                 | <input type="checkbox"/>            | <input type="checkbox"/> | NA             |

| Section/topic                     | #  | Checklist item                                                                   | Information reported     |                          | Line number(s) |
|-----------------------------------|----|----------------------------------------------------------------------------------|--------------------------|--------------------------|----------------|
|                                   |    |                                                                                  | Yes                      | No                       |                |
| Confidence in cumulative evidence | 17 | Describe how the strength of the body of evidence will be assessed (e.g., GRADE) | <input type="checkbox"/> | <input type="checkbox"/> | NA             |

4 NA not applicable  
5 SF1 supplementary file 1  
6 Fig. 1 Figure 1  
7  
8  
9  
10  
11  
12

**Supplementary file 1.** Electronic search: database and terms included.

The electronic search was conducted from 1<sup>st</sup> January 2000 to 31<sup>th</sup> December 2018. A PICOS approach was used for framing the research question and the evidence search. **PARTICIPANTS:** *Child\* OR adolescent\* OR young\* OR youth.* **INTERVENTIONS:** *Yoga OR yogic OR meditation OR Tai Chi OR mindfulness OR mindful OR mindfulness-based OR mind-body OR relaxation OR zen.* **COMPARISONS:** Not applicable. **OUTCOMES:** Medical condition terms (*ADHD OR attention deficit OR attention-deficit OR hyperkinetic syndrome OR hyperkinetic disorder*). **STUDY DESIGN:** *intervention OR program OR therapy OR training OR school based intervention.* Additional filters: All database, builder terms: Title/abstract for PUBMED, TOPIC for WOS, and abstract for PsycINFO and EBSCOhost.

The following terms were used for each category:

**a) Pubmed:** (from 01-01-2000 to 2018)

(((((Child\*[Title/Abstract] OR adolescent\*[Title/Abstract] OR young\*[Title/Abstract] OR youth[Title/Abstract])) AND (Yoga[Title/Abstract] OR yogic[Title/Abstract] OR meditation[Title/Abstract] OR Tai Chi[Title/Abstract] OR mindfulness[Title/Abstract] OR mindful[Title/Abstract] OR mindfulness-based[Title/Abstract] OR mind-body[Title/Abstract] OR relaxation[Title/Abstract] OR zen[Title/Abstract])) AND (ADHD[Title/Abstract] OR attention deficit[Title/Abstract] OR attention-deficit[Title/Abstract] OR hyperkinetic syndrome[Title/Abstract] OR hyperkinetic disorder[Title/Abstract])) AND (intervention[Title/Abstract] OR program[Title/Abstract] OR therapy[Title/Abstract] OR training[Title/Abstract] OR school based intervention[Title/Abstract]))

Additional filters: All database [builder term: Title/Abstract])

**b) WOS:** (from 2000 to 2018) main collection of Web of Science

TOPIC: (Child\* OR adolescent\* OR young\* OR youth) AND TOPIC: (Yoga OR yogic OR meditation OR Tai Chi OR mindfulness OR mindful OR mindfulness-based OR mind-body OR relaxation OR zen) AND TOPIC: (ADHD OR attention deficit OR attention-deficit OR hyperkinetic syndrome OR hyperkinetic disorder) AND TOPIC: (intervention OR program OR therapy OR training OR school based intervention)

Additional filters: main collection of Web of Science [builder term: Topic])

39  
40  
41  
42  
43  
44  
45  
46  
47  
48  
49  
50  
51  
52  
53  
54  
55  
56  
57  
58

**c) PsycINFO:** (from 01/01/2000 to 31/12/2018)

*ab(Child\* OR adolescent\* OR young\* OR youth) AND ab(Yoga OR yogic OR meditation OR Tai Chi OR mindfulness OR mindful OR mindfulness-based OR mind-body OR relaxation OR zen) AND ab(ADHD OR attention deficit OR attention-deficit OR hyperkinetic syndrome OR hyperkinetic disorder) AND ab(intervention OR program OR therapy OR training OR school based intervention).*

Additional filters: [builder term: ab Abstract])

**d) EBSCOhost:** (from January 2000 to Dec 2018)

*AB ( Child\* OR adolescent\* OR young\* OR youth ) AND AB ( Yoga OR yogic OR meditation OR Tai Chi OR mindfulness OR mindful OR mindfulness-based OR mind-body OR relaxation OR zen ) AND AB ( ADHD OR attention deficit OR attention-deficit OR hyperkinetic syndrome OR hyperkinetic disorder ) AND AB ( intervention OR program OR therapy OR training OR school based intervention)*

Additional filters: [builder term: AB Abstract])

**Supplementary Table 2.** Quality Assessment of Controlled Intervention Studies.

|                                                                                                                                                          | Gershby et al.<br>2017 <sup>#</sup> | Chou et al.<br>2017 <sup>*</sup> | Jensen et al.<br>2004 <sup>#</sup> | Kiani et al.<br>2012 <sup>#</sup> | Lo et al.<br>2017 <sup>#</sup> | Behbahani<br>2018 <sup>#</sup> |
|----------------------------------------------------------------------------------------------------------------------------------------------------------|-------------------------------------|----------------------------------|------------------------------------|-----------------------------------|--------------------------------|--------------------------------|
| 1. Was the study described as randomised, a randomised clinical trial, or an RCT?                                                                        | Yes                                 | Yes                              | Yes                                | Yes                               | Yes                            | Yes                            |
| 1.1 Or did they describe it as cluster randomised?                                                                                                       | NA                                  | NA                               | NA                                 | NA                                | NA                             | NA                             |
| 2. Was the method of the randomisation adequate (i.e., use of randomly generated assignment)?                                                            | Yes                                 | Yes                              | NA                                 | Yes                               | Yes                            | Yes                            |
| 3. Was the treatment allocation concealed (so that assignments could not be predicted)?                                                                  | Yes                                 | Yes                              | No                                 | No                                | No                             | No                             |
| 4.a) Were study participants blinded to the treatment-group assignments?                                                                                 | Yes                                 | No                               | No                                 | No                                | No                             | No                             |
| 4. b) Were providers blinded to the treatment group assignments?                                                                                         | Yes                                 | No                               | No                                 | No                                | No                             | No                             |
| 4.1 In case of cluster-randomisation: Was the recruitment of participants conducted by an individual independent of the trial?                           | NA                                  | NA                               | NA                                 | NA                                | NA                             | NA                             |
| 5. Were the people blinded to the participant's group assignment?                                                                                        | Yes                                 | No                               | No                                 | No                                | No                             | No                             |
| 6. Were the groups similar at baseline on important characteristics that could affect outcomes (i.e., demographics, risk-factors, co-morbid conditions)? | Yes                                 | Yes                              | Yes                                | NA                                | Yes                            | Yes                            |
| 6.1 In case of cluster randomisation: Did they use stratification or matched-pairs before randomisation to reduce baseline-imbalances?                   | NA                                  | NA                               | NA                                 | NA                                | NA                             | NA                             |

|                                                                                                                                                                              |      |      |      |      |      |      |
|------------------------------------------------------------------------------------------------------------------------------------------------------------------------------|------|------|------|------|------|------|
| 7. Was the overall drop-out rate from the study at endpoint 20% or lower of the number allocated to treatment?                                                               | Yes  | Yes  | Yes  | Yes  | Yes  | Yes  |
| 8. Was the differential drop-out rate (between treatment groups) at endpoint 15 percentage points or lower?                                                                  | Yes  | Yes  | Yes  | Yes  | Yes  | Yes  |
| 9. Was there high adherence to the intervention protocols for each treatment group?                                                                                          | Yes  | Yes  | Yes  | NR   | Yes  | NR   |
| 10. Were other interventions avoided or similar in the groups (e.g., similar background treatments)?                                                                         | NR   | NR   | NR   | NR   | NR   | NR   |
| 12. Did the authors report the calculation of a sufficiently large sample size to be able to detect a difference in the main outcome between groups with at least 80% power? | No   | No   | No   | No   | No   | No   |
| 12.1 a) In case of cluster-randomisation: Did they take clustering effects into account in their statistical analysis?                                                       | NA   | NA   | NA   | NA   | NA   | NA   |
| 21.1 b) In case of cluster-randomisation: Did they consider intra-class-correlation regarding sample size calculation?                                                       | NA   | NA   | NA   | NA   | NA   | NA   |
| 13. Were outcomes or analysed subgroups which were reported prespecified? (i.e., identified before analyses was conducted)?                                                  | Yes  | Yes  | Yes  | Yes  | Yes  | Yes  |
| 14. Were all randomised participants analysed in the group to which they were originally assigned, i.e., did they use an intention-to-treat analysis?                        | Yes  | Yes  | Yes  | Yes  | Yes  | Yes  |
| Quality rating: (good, fair or poor)                                                                                                                                         | fair | poor | poor | poor | poor | poor |

# RCT study.

\* Clinical trial study.

NA not applicable, NR not reported.



**Supplementary Table 3.** Quality Assessment for Before-After Studies (Pre-Post Studies with No Control group).

|                                                                                                                                                                                                                             | Haripras<br>ad et al.<br>2013 | Haydick<br>y et al.<br>2015 | Van der<br>Oord et al.<br>2012 | Zylo<br>a et<br>2007 |
|-----------------------------------------------------------------------------------------------------------------------------------------------------------------------------------------------------------------------------|-------------------------------|-----------------------------|--------------------------------|----------------------|
| 1. Was the study question or objective clearly stated?                                                                                                                                                                      | Yes                           | Yes                         | Yes                            | Yes                  |
| 2. Were eligibility/selection criteria for the study population prespecified and clearly described?                                                                                                                         | Yes                           | Yes                         | Yes                            | Yes                  |
| 3. Were the participants in the study representative of those who were eligible for the test/service/intervention in the general or clinical population of interest?                                                        | No                            | No                          | No                             | No                   |
| 4. Were all eligible participants that meet the prespecified entry criteria enrolled?                                                                                                                                       | Yes                           | Yes                         | Yes                            | Yes                  |
| 5. Was the sample size sufficiently large to provide confidence in the findings?                                                                                                                                            | No                            | No                          | No                             | No                   |
| 6. Was the test/service/intervention clearly described and delivered consistently across the study population?                                                                                                              | Yes                           | Yes                         | Yes                            | Yes                  |
| 7. Were the outcome measures prespecified, clearly defined, valid, reliable and assessed consistently across all study participants?                                                                                        | Yes                           | Yes                         | Yes                            | Yes                  |
| 8. Were the people assessing the outcomes blinded to the participants' exposure/interventions?                                                                                                                              | No                            | No                          | No                             | No                   |
| 9. Was the loss to follow-up after baseline 20% or less? Were those lost to follow-up accounted for in the analysis?                                                                                                        | Yes                           | Yes                         | Yes                            | Yes                  |
| 10. Did they use statistical methods that examined changes in outcome measures from before to after the intervention? Were statistical tests done that provided p values for the pre-to-post changes?                       | No                            | No                          | NR                             | Yes                  |
| 11. Were outcome measures of interest taken multiple times before the intervention and multiples times after the intervention (i.e., did they use an interrupted time-series design)?                                       | Yes                           | Yes                         | No                             | No                   |
| 12. If the intervention was conducted at a group level (e.g., a whole hospital, a community, etc.) did the statistical analysis take into account the use of individual-level data to determine effects at the group level? | Yes                           | Yes                         | No                             | Yes                  |
| Quality rating: (good, fair or poor)                                                                                                                                                                                        | poor                          | poor                        | poor                           | poor                 |
| NR not reported                                                                                                                                                                                                             |                               |                             |                                |                      |
